# Supplementary material for: Climate change risks illustrated by the Intergovernmental Panel on Climate Change (IPCC) “burning embers”
Source: Copernicus journal article supplement (doi:10.5194/essd-17-317-2025), 2025-01-31
Supplement: Supplementary file 1 [file essd-17-317-2025-supplement.pdf]

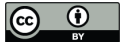

*Supplement of*

## **Climate change risks illustrated by the Intergovernmental Panel on Climate Change (IPCC) “burning embers”**

**Philippe Marbaix et al.**

*Correspondence to:* Philippe Marbaix ([philippe.marbaix@uclouvain.be](mailto:philippe.marbaix@uclouvain.be))

The copyright of individual parts of the supplement might differ from the article licence.

## Content

---

|                                                                     |    |
|---------------------------------------------------------------------|----|
| S1 Data description                                                 | 1  |
| S1.1 Embers database fields                                         | 1  |
| S1.2 JSON data description                                          | 5  |
| S1.3. Remote API Access point & token                               | 8  |
| S2 Sources and calculations related to the GMT/GMSST ratio          | 9  |
| S3 Extraction of risk transition limits from AR5 SYR ember diagrams | 11 |
| References                                                          | 14 |

## S1 Data description

---

### S1.1 Embers database fields

The database stores information about 'burning embers' diagrams and the related metadata (see Embers below). The general structure of the tables/models is the following (see Fig. 2 of the main paper):

BiblioReferences (as a rule, IPCC reports) contain figures, which contain EmberGroups (groups of embers), which contain Embers, which are described through (risk) Transitions, which contain Levels. Scenarios are linked to Embers, and Axis are linked to EmberGroups.

In the documentation fields, 'Links to' means that the database field is a foreign key. The database is managed by PostgreSQL and currently accessed through Django's ORM.

### Ember

Embers, short for 'burning embers', are the fundamental elements stored in this database, a synthetic illustration of how risks and impacts increase with a given metric of climate change (for example Zommers et al. 2020, NREE, <https://www.nature.com/articles/s43017-020-0088-0>).

|                  |                                                                                                                                                                                                                                                                                                         |
|------------------|---------------------------------------------------------------------------------------------------------------------------------------------------------------------------------------------------------------------------------------------------------------------------------------------------------|
| id               | (primary key for this data table/model)                                                                                                                                                                                                                                                                 |
| maingroup_id     | Links to the 'main group', which is typically a group included in a 'basis figure' in the chapter which is the most important source for assessing this ember. The maingroup is used as default group for embers included in several groups (used when the context does not indicate a specific group). |
| scenariogroup_id | Links to a group containing a set of embers describing the same risks in the context of different vulnerability/adaptation scenarios (optional).                                                                                                                                                        |
| scenario_id      | Links to a scenario. In this database, a 'scenario' is a set of elements defining a 'context' wrt. impacts of climate change, such a shared socio-economic pathway (SSP) or a level of adaptation (capacity).                                                                                           |
| name             | The name of this ember, usually shown under the ember in diagrams.                                                                                                                                                                                                                                      |
| haz_name         | A default 'descriptive' name for the hazard variable, which may be used on the vertical axis if this ember is drawn alone, with no figure/panel axis.                                                                                                                                                   |
| haz_name_std     | The standard name of the variable used to define hazard levels.                                                                                                                                                                                                                                         |
| haz_unit         | The unit of the variable used to define hazard levels.                                                                                                                                                                                                                                                  |
| haz_valid_bottom | The bottom of the assessed range, in the same unit as hazard levels.                                                                                                                                                                                                                                    |
| haz_valid_top    | The top of the assessed range, in the same unit as hazard levels.                                                                                                                                                                                                                                       |

|                    |                                                                                                                                                                                                                                                                                                                                                                         |
|--------------------|-------------------------------------------------------------------------------------------------------------------------------------------------------------------------------------------------------------------------------------------------------------------------------------------------------------------------------------------------------------------------|
| longname           | A name that fully indicates which risk is assessed. This name is specific to this database; unlike some original ember names, which need a specific context, the longer name is sufficient to define the topic, without group name or figure title.                                                                                                                     |
| description        | A short description of the scope of this ember, explaining which risk is assessed.                                                                                                                                                                                                                                                                                      |
| sup_information    | Additional information (that does not fit in other categories).                                                                                                                                                                                                                                                                                                         |
| internal_notes     | Notes containing information for database editors (restricted).                                                                                                                                                                                                                                                                                                         |
| keywords           | Keywords may help in defining groups of 'related' embers for identification, illustration, or aggregated analysis.                                                                                                                                                                                                                                                      |
| inclusion_level    | Inclusion level relates to API access: it advises on how far an ember could be 'adequate' for use in analyses, in particular to list some embers as superseded by a newer assessment. -3 is the lowest 'adequacy/inclusion' level, +2 is the highest. In JSON output the levels are defined in the general metadata for the key 'ember_inclusion_levels'.               |
| publication_status | Access to an ember may be restricted to editors while the data is being prepared. Visitors can only view embers which include PUB(lic) in publication_status. Three public access levels are defined, depending on how far the data is finalised: NUM (numeric assessment of hazard/risk levels), DESC (ember description), FULL (all fields except for internal ones). |
| spec_references    | Specific references: indicates the sections within the chapter or supplementary material (indicated by the bibliographic reference for the main figure containing these embers), and additional references if needed.                                                                                                                                                   |
| update_ts          | The date+time of the last update; this field may be removed in the future, as it could be included in update_log.                                                                                                                                                                                                                                                       |
| update_log_id      | Links to a log entry for the last change.                                                                                                                                                                                                                                                                                                                               |

### Transition

A risk transition is a change in risk from one level to the next. It is defined through a set of 'levels' of risk for which the climate change metric is assessed, from min to max.

|                   |                                                                                                                                                                                                                                                                      |
|-------------------|----------------------------------------------------------------------------------------------------------------------------------------------------------------------------------------------------------------------------------------------------------------------|
| id                | (primary key for this data table/model)                                                                                                                                                                                                                              |
| ember_id          | The ember which contains this transition.                                                                                                                                                                                                                            |
| name              | The name of the transition (<name of the first risk level> to <name of the second risk level>, such as 'undetectable to moderate').                                                                                                                                  |
| confidence        | A list of one, or exceptionally two, confidence level(s). Two levels would relate to two nested transition ranges. At the date of 1 May 2024, using two confidence levels has only been suggested for AR6 RFC4 but not actually used to draw embers in IPCC reports. |
| explanation_short | A summary of the elements explaining the assessment of the levels of climate change in this risk transition.                                                                                                                                                         |
| explanation_ipcc  | Draft and/or longer text; currently restricted to database editors.                                                                                                                                                                                                  |
| internal_notes    | (restricted).                                                                                                                                                                                                                                                        |

### Level

A Level is a risk level for which hazard is assessed. Within a transition, levels are distinguished by their 'phase', such as 'min', 'median', 'max' or percentiles (pXX).

|              |                                                                                                                   |
|--------------|-------------------------------------------------------------------------------------------------------------------|
| id           | (primary key for this data table/model)                                                                           |
| trans_id     | The transition in which this level is included.                                                                   |
| phase        | Phases are 'steps' within transitions. The combination of a transition and phase defines a level within an ember. |
| phase_index  | Intended as sorting criteria.                                                                                     |
| hazard_level | The hazard level assessed for this risk level.                                                                    |

## Embergroup

An Embergroup is a set of embers in the report (it may be a figure panel).

|                 |                                                                                                                                                              |
|-----------------|--------------------------------------------------------------------------------------------------------------------------------------------------------------|
| id              | (primary key for this data table/model)                                                                                                                      |
| figure_id       | The figure in which this group of embers is shown.                                                                                                           |
| name            | The name of this group of embers (e.g. the title of a figure panel).                                                                                         |
| haz_axis_id     | The hazard axis for drawing this group of embers (found in database table 'axis' or json field 'axes').                                                      |
| data_references | References for the numerical data in this group of embers (not used so far and thus not included in the JSON output; may change or be removed in the future) |

## Ember2Embergroup

Intermediate table to link Embers and Embergroups through a many-to-many relationship

|               |                                                                  |
|---------------|------------------------------------------------------------------|
| id            | (primary key for this data table/model)                          |
| ember_id      | Link to an ember.                                                |
| embergroup_id | Link to an embergroup.                                           |
| nameingroup   | The name of this ember when shown in this group/figure.          |
| iorder        | An index for manual ordering embers within a group, when needed. |

## Figure

Figures store general information about figures containing embers, such as their title and a link to their source.

|                    |                                                                                   |
|--------------------|-----------------------------------------------------------------------------------|
| id                 | (primary key for this data table/model)                                           |
| biblioreference_id | The bibliographic reference (BiblioReference) containing this figure.             |
| number             | The number of this figure (as text).                                              |
| shortname          | A short and easily recognisable name used to refer to this figure.                |
| title              | A title for this figure (optional).                                               |
| caption            | Figure caption.                                                                   |
| sup_information    | Additional information relative to the figure (not to an ember).                  |
| page               | The page number in the source reference.                                          |
| errata_url         | If this figure was subject to an errata, this is a link to the corrected version. |
| sortkey            | An auto-generated sort-key for figures.                                           |

## Axis

Describes axes (the plural of axis): the primary intended use is for the vertical axis of embers, related to the 'hazard' variable.

|              |                                                                                                                  |
|--------------|------------------------------------------------------------------------------------------------------------------|
| id           | (primary key for this data table/model)                                                                          |
| shortname    | A short and easily recognisable name used to refer to this axis for axis selection.                              |
| name         | Axis 'name', for use as label (axis title) on the diagram.                                                       |
| var_name_std | A standard name for the variable represented in this axis.                                                       |
| var_unit     | A unit for the represented variable (may not be needed if there is a 'generic' unit associated to var_name_std). |
| top          | The value of the represented variable at the top of the axis.                                                    |
| bottom       | The value of the represented variable at the bottom of the axis.                                                 |

|           |                                                                                                                                                                                                                                                                               |
|-----------|-------------------------------------------------------------------------------------------------------------------------------------------------------------------------------------------------------------------------------------------------------------------------------|
| grid_show | Whether full grid-lines should be shown (All), or just tick marks except for lines defined by the user (User).                                                                                                                                                                |
| lines_num | An indication of the desired axis tick-marks and/or grid lines, which will be rounded to a graph-adapted value by the software.                                                                                                                                               |
| lines_add | A list of custom grid-lines and/or shaded areas, defined by a set of key/values pairs (corresponding to EmberMaker graphical parameters).For example, a shaded area between 1.4 and 1.6 could be defined as [{line: 1.4, shade_end: 1.6, color: 'blue', label: '2025-2035'}]. |

## Scenario

The term scenario is used here to refer to all elements defining a 'context' wrt. impacts of climate change. Examples are 'shared socio-economic pathways' (SSPs), narratives describing vulnerability and/or exposure, or simply a qualifier for the level of adaptation.

|             |                                                                                                                                          |
|-------------|------------------------------------------------------------------------------------------------------------------------------------------|
| id          | (primary key for this data table/model)                                                                                                  |
| name        | A short and easily recognisable name used to refer to this scenario.                                                                     |
| description | A description of this scenario.                                                                                                          |
| reference   | A free-text reference, which may contain a page or section number (it may be transformed into a more structured citation in the future). |
| adapt_index | An adaptation index used to sort and name adaptation scenarios(1 = low, 2 = medium, 3 = high adaptation).                                |

## BiblioReference

Bibliographic references, in particular (but not limited to) an IPCC report

|             |                                                                                                                                                                                    |
|-------------|------------------------------------------------------------------------------------------------------------------------------------------------------------------------------------|
| id          | (primary key for this data table/model)                                                                                                                                            |
| cite_key    | The citation key.                                                                                                                                                                  |
| type        | The type of publication: 'article', 'book', or 'incollection'.                                                                                                                     |
| author      | Authors (separate authors with a comma or 'and').                                                                                                                                  |
| editor      | Editors (separate editors with a comma or 'and').                                                                                                                                  |
| title       | Title of the book or chapter.                                                                                                                                                      |
| volume      | Volume of the publication (not used so far).                                                                                                                                       |
| chapter     | Chapter number, required if the type is 'incollection'.                                                                                                                            |
| doi         | DOI (Digital Object Identifier) for this publication (formatted as in BibTeX, that is, including <a href="https://doi.org">https://doi.org</a> ).                                  |
| isbn        | ISBN (International Standard Book Number), authorised only for books (optional).                                                                                                   |
| url         | URL to access this publication; if a DOI is available, this is a secondary link.                                                                                                   |
| sm_url      | URL for the Supplemental Material; empty string if this publication has no SM. Note: the SM will appear as a reference in addition to the main document when this field is filled. |
| journal     | Journal of the publication (optional).                                                                                                                                             |
| publisher   | The publisher; inherited if left empty and a parent reference is available.                                                                                                        |
| year        | Publication year.                                                                                                                                                                  |
| pages       | Either the total number of pages, or the page range of this part of a book.                                                                                                        |
| crossref_id | A parent reference, such as a report in which this reference is a chapter.                                                                                                         |
| keywords    | Keywords (optional, separate keywords with a comma).                                                                                                                               |

## S1.2 JSON data description

This section describes the structure of the JSON data used in archive files or obtained from the online API (S1.3).

The fields are mostly identical to the fields in the database, but there are some differences: the structure of the JSON data includes a few additional fields which provide related information with no or less need to follow links between data tables. This benefits from the fact that the JSON data is a « frozen output » intended to be read but not modified, by contrast to the database. In particular, each ember contains a field named « transitions » (plural) which contains the list of transitions for that ember. By contrast, the Ember table in the database does not contain a transition field; transitions are obtained from the Transition table by the database management software (PostgreSQL) through the foreign key for embers; thanks to a different structure, made for data consultation, this is not needed here. The fields which are specific to the JSON output are **marked in blue**.

|               |                                                                                                                                                                                                                                                                                                                                                                                                 |                                                                                                                                                                                                                                                                                                                                         |
|---------------|-------------------------------------------------------------------------------------------------------------------------------------------------------------------------------------------------------------------------------------------------------------------------------------------------------------------------------------------------------------------------------------------------|-----------------------------------------------------------------------------------------------------------------------------------------------------------------------------------------------------------------------------------------------------------------------------------------------------------------------------------------|
| <b>embers</b> | Embers, short for 'burning embers', are the fundamental elements stored in this database, a synthetic illustration of how risks and impacts increase with a given metric of climate change (for example Zommers et al. 2020, NREE, <a href="https://www.nature.com/articles/s43017-020-0088-0">https://www.nature.com/articles/s43017-020-0088-0</a> ). This field contains a list of 'embers'. |                                                                                                                                                                                                                                                                                                                                         |
|               | <b>id</b>                                                                                                                                                                                                                                                                                                                                                                                       | Unique identifier (primary key) of an ember                                                                                                                                                                                                                                                                                             |
|               | <b>group_ids</b>                                                                                                                                                                                                                                                                                                                                                                                | Unique identifiers (list of foreign keys): related groups, containing the given ember                                                                                                                                                                                                                                                   |
|               | <b>maingroup_id</b>                                                                                                                                                                                                                                                                                                                                                                             | Unique identifier (foreign key): links to the 'main group', which is typically a group included in a 'basis figure' in the chapter which is the most important source for assessing this ember. The maingroup is used as default group for embers included in several groups (used when the context does not indicate a specific group) |
|               | <b>mainfigure_id</b>                                                                                                                                                                                                                                                                                                                                                                            | Unique identifier (foreign key): links to the figure which contains the main (=default) group which contains this ember                                                                                                                                                                                                                 |
|               | <b>scenariogroup_id</b>                                                                                                                                                                                                                                                                                                                                                                         | Unique identifier (foreign key): links to a group containing a set of embers describing the same risks in the context of different vulnerability/adaptation scenarios (optional)                                                                                                                                                        |
|               | <b>scenario_id</b>                                                                                                                                                                                                                                                                                                                                                                              | Unique identifier (foreign key): links to a scenario. In this database, a 'scenario' is a set of elements defining a 'context' wrt. impacts of climate change, such as a shared socio-economic pathway (SSP) or a level of adaptation (capacity)                                                                                        |
|               | <b>name</b>                                                                                                                                                                                                                                                                                                                                                                                     | The name of this ember, usually shown under the ember in diagrams                                                                                                                                                                                                                                                                       |
|               | <b>longname</b>                                                                                                                                                                                                                                                                                                                                                                                 | A name that fully indicates which risk is assessed. This name is specific to this database; unlike some original ember names, which need a specific context, the longer name is sufficient to define the topic, without group name or figure title                                                                                      |
|               | <b>haz_name</b>                                                                                                                                                                                                                                                                                                                                                                                 | A default 'descriptive' name for the hazard variable, which may be used on the vertical axis if this ember is drawn alone, with no figure/panel axis                                                                                                                                                                                    |
|               | <b>haz_name_std</b>                                                                                                                                                                                                                                                                                                                                                                             | The standard name of the variable used to define hazard levels                                                                                                                                                                                                                                                                          |
|               | <b>haz_unit</b>                                                                                                                                                                                                                                                                                                                                                                                 | The unit of the variable used to define hazard levels                                                                                                                                                                                                                                                                                   |
|               | <b>haz_valid</b>                                                                                                                                                                                                                                                                                                                                                                                | The range of hazard values over which risk was assessed, a list of 2 elements [haz_valid_bottom, haz_valid_top]                                                                                                                                                                                                                         |
|               | <b>description</b>                                                                                                                                                                                                                                                                                                                                                                              | A short description of the scope of this ember, explaining which risk is assessed                                                                                                                                                                                                                                                       |
|               | <b>sup_information</b>                                                                                                                                                                                                                                                                                                                                                                          | Additional information (that does not fit in other categories)                                                                                                                                                                                                                                                                          |
|               | <b>keywords</b>                                                                                                                                                                                                                                                                                                                                                                                 | Keywords may help in defining groups of 'related' embers for identification, illustration, or aggregated analysis                                                                                                                                                                                                                       |
|               | <b>spec_references</b>                                                                                                                                                                                                                                                                                                                                                                          | Specific references: indicates the sections within the chapter or supplementary material (indicated by the bibliographic reference for the main figure containing these embers), and additional references if needed                                                                                                                    |

|                    |                                                                                                                                                                           |                                                                                                                                                                                                                                                                                                                                                          |                                                                                                                                                                                                                                                                     |
|--------------------|---------------------------------------------------------------------------------------------------------------------------------------------------------------------------|----------------------------------------------------------------------------------------------------------------------------------------------------------------------------------------------------------------------------------------------------------------------------------------------------------------------------------------------------------|---------------------------------------------------------------------------------------------------------------------------------------------------------------------------------------------------------------------------------------------------------------------|
|                    | <b>inclusion_level</b>                                                                                                                                                    | Inclusion level relates to API access: it advises on how far an ember could be 'adequate' for use in analyses, in particular to list some embers as superseded by a newer assessment. -3 is the lowest 'adequacy/inclusion' level, +2 is the highest. In JSON output the levels are defined in the general metadata for the key 'ember_inclusion_levels' |                                                                                                                                                                                                                                                                     |
|                    | <b>transitions</b>                                                                                                                                                        | A risk transition is a change in risk from one level to the next. It is defined through a set of 'levels' of risk for which the climate change metric is assessed, from min to max.<br>This field contains a list of 'transitions'.                                                                                                                      |                                                                                                                                                                                                                                                                     |
|                    |                                                                                                                                                                           | <b>id</b>                                                                                                                                                                                                                                                                                                                                                | Unique identifier (primary key) of a transition                                                                                                                                                                                                                     |
|                    |                                                                                                                                                                           | <b>name</b>                                                                                                                                                                                                                                                                                                                                              | The name of the transition (<name of the first risk level> to <name of the second risk level>, such as 'undetectable to moderate')                                                                                                                                  |
|                    |                                                                                                                                                                           | <b>confidence</b>                                                                                                                                                                                                                                                                                                                                        | A list of one, or exceptionally two, confidence level(s). Two levels would relate to two nested transition ranges. At the date of 1 May 2024, using two confidence levels has only been suggested for AR6 RFC4 but not actually used to draw embers in IPCC reports |
|                    |                                                                                                                                                                           | <b>explanation_short</b>                                                                                                                                                                                                                                                                                                                                 | A summary of the elements explaining the assessment of the levels of climate change in this risk transition                                                                                                                                                         |
|                    |                                                                                                                                                                           | <b>levels</b>                                                                                                                                                                                                                                                                                                                                            | Assessed hazard levels within the transition, provided as key:value pairs where the key is the level's 'phase' (such as 'min', 'median') and the value is the level's 'hazard'                                                                                      |
| <b>embergroups</b> | An Embergroup is a set of embers in the report (it may be a figure panel). This field contains a list of 'embergroups'.                                                   |                                                                                                                                                                                                                                                                                                                                                          |                                                                                                                                                                                                                                                                     |
|                    | <b>id</b>                                                                                                                                                                 | Unique identifier (primary key) of an embergroup                                                                                                                                                                                                                                                                                                         |                                                                                                                                                                                                                                                                     |
|                    | <b>name</b>                                                                                                                                                               | The name of this group of emberse.g. the title of a figure panel                                                                                                                                                                                                                                                                                         |                                                                                                                                                                                                                                                                     |
|                    | <b>figure_id</b>                                                                                                                                                          | Unique identifier (foreign key): the figure in which this group of embers is shown                                                                                                                                                                                                                                                                       |                                                                                                                                                                                                                                                                     |
|                    | <b>ember_ids</b>                                                                                                                                                          | Unique identifiers (list of foreign keys): related embers, containing the given embergroup                                                                                                                                                                                                                                                               |                                                                                                                                                                                                                                                                     |
|                    | <b>haz_axis_id</b>                                                                                                                                                        | Unique identifier (foreign key): the hazard axis for drawing this group of embers (found in database table 'axis' or json field 'axes')                                                                                                                                                                                                                  |                                                                                                                                                                                                                                                                     |
| <b>figures</b>     | Figures store general information about figures containing embers, such as their title and a link to their source. This field contains a list of 'figures'.               |                                                                                                                                                                                                                                                                                                                                                          |                                                                                                                                                                                                                                                                     |
|                    | <b>id</b>                                                                                                                                                                 | Unique identifier (primary key) of a figure                                                                                                                                                                                                                                                                                                              |                                                                                                                                                                                                                                                                     |
|                    | <b>shortname</b>                                                                                                                                                          | A short an easily recognizable name used to refer to this figure                                                                                                                                                                                                                                                                                         |                                                                                                                                                                                                                                                                     |
|                    | <b>number</b>                                                                                                                                                             | The number of this figure (as text)                                                                                                                                                                                                                                                                                                                      |                                                                                                                                                                                                                                                                     |
|                    | <b>title</b>                                                                                                                                                              | A title for this figure (optional)                                                                                                                                                                                                                                                                                                                       |                                                                                                                                                                                                                                                                     |
|                    | <b>sup_information</b>                                                                                                                                                    | Additional information relative to the figure (not to an ember)                                                                                                                                                                                                                                                                                          |                                                                                                                                                                                                                                                                     |
|                    | <b>biblioreference_id</b>                                                                                                                                                 | Unique identifier (foreign key): the bibliographic reference (BiblioReference) containing this figure                                                                                                                                                                                                                                                    |                                                                                                                                                                                                                                                                     |
|                    | <b>biblioreference.cite_key</b>                                                                                                                                           | The citation key                                                                                                                                                                                                                                                                                                                                         |                                                                                                                                                                                                                                                                     |
|                    | <b>biblioreference</b>                                                                                                                                                    | The full text of the reference for this publication, in Markdown format                                                                                                                                                                                                                                                                                  |                                                                                                                                                                                                                                                                     |
| <b>Axes</b>        | Describes axes (the plural of axis): the primary intended use is for the vertical axis of embers, related to the 'hazard' variable. This field contains a list of 'axes'. |                                                                                                                                                                                                                                                                                                                                                          |                                                                                                                                                                                                                                                                     |
|                    | <b>id</b>                                                                                                                                                                 | Unique identifier (primary key) of an axis                                                                                                                                                                                                                                                                                                               |                                                                                                                                                                                                                                                                     |
|                    | <b>shortname</b>                                                                                                                                                          | A short an easily recognizable name used to refer to this axis for axis selection                                                                                                                                                                                                                                                                        |                                                                                                                                                                                                                                                                     |
|                    | <b>name</b>                                                                                                                                                               | Axis 'name', for use as label (axis title) on the diagram                                                                                                                                                                                                                                                                                                |                                                                                                                                                                                                                                                                     |

|                               |                                                                                                                                                                                                                                                                                                                       |                                                                                                                                                                                                                                                                                            |
|-------------------------------|-----------------------------------------------------------------------------------------------------------------------------------------------------------------------------------------------------------------------------------------------------------------------------------------------------------------------|--------------------------------------------------------------------------------------------------------------------------------------------------------------------------------------------------------------------------------------------------------------------------------------------|
|                               | <b>var_name_std</b>                                                                                                                                                                                                                                                                                                   | A standard name for the variable represented in this axis                                                                                                                                                                                                                                  |
|                               | <b>var_unit</b>                                                                                                                                                                                                                                                                                                       | A unit for the represented variable (may not be needed if there is a 'generic' unit associated to var_name_std)                                                                                                                                                                            |
|                               | <b>bottom</b>                                                                                                                                                                                                                                                                                                         | The value of the represented variable at the bottom of the axis                                                                                                                                                                                                                            |
|                               | <b>top</b>                                                                                                                                                                                                                                                                                                            | The value of the represented variable at the top of the axis                                                                                                                                                                                                                               |
|                               | <b>grid_show</b>                                                                                                                                                                                                                                                                                                      | Whether full grid-lines should be shown (All), or just tick marks except for lines defined by the user (User)                                                                                                                                                                              |
|                               | <b>lines_num</b>                                                                                                                                                                                                                                                                                                      | An indication of the desired axis tick-marks and/or grid lines, which will be rounded to a graph-adapted value by the software                                                                                                                                                             |
|                               | <b>lines_add</b>                                                                                                                                                                                                                                                                                                      | A list of custom grid-lines and/or shaded areas, defined by a set of key/values pairs (corresponding to EmberMaker graphical parameters). For example, a shaded area between 1.4 and 1.6 could be defined as <code>[[line: 1.4, shade_end: 1.6, color: 'blue', label: '2025-2035']]</code> |
| <b>scenarios</b>              | The term scenario is used here to refer to all elements defining a 'context' wrt. impacts of climate change. Examples are 'shared socio-economic pathways' (SSPs), narratives describing vulnerability and/or exposure, or simply a qualifier for the level of adaptation. This field contains a list of 'scenarios'. |                                                                                                                                                                                                                                                                                            |
|                               | <b>id</b>                                                                                                                                                                                                                                                                                                             | Unique identifier (primary key) of a scenario                                                                                                                                                                                                                                              |
|                               | <b>name</b>                                                                                                                                                                                                                                                                                                           | A short and easily recognizable name used to refer to this scenario                                                                                                                                                                                                                        |
|                               | <b>description</b>                                                                                                                                                                                                                                                                                                    | A description of this scenario                                                                                                                                                                                                                                                             |
|                               | <b>reference</b>                                                                                                                                                                                                                                                                                                      | A free-text reference, which may contain a page or section number (it may be transformed into a more structured citation in the future)                                                                                                                                                    |
|                               | <b>adapt_index</b>                                                                                                                                                                                                                                                                                                    | An adaptation index used to sort and name adaptation scenarios(1 = low, 2 = medium, 3 = high adaptation)                                                                                                                                                                                   |
| <b>biblioreferences</b>       | A bibliographic reference, in particular (but not limited to) an IPCC report. This field contains a list of 'biblioreferences'.                                                                                                                                                                                       |                                                                                                                                                                                                                                                                                            |
|                               | <b>id</b>                                                                                                                                                                                                                                                                                                             | Unique identifier (primary key) of a biblioreference                                                                                                                                                                                                                                       |
|                               | <b>cite_key</b>                                                                                                                                                                                                                                                                                                       | The citation key                                                                                                                                                                                                                                                                           |
|                               | <b>title</b>                                                                                                                                                                                                                                                                                                          | Title of the book or chapter                                                                                                                                                                                                                                                               |
|                               | <b>year</b>                                                                                                                                                                                                                                                                                                           | Publication year                                                                                                                                                                                                                                                                           |
|                               | <b>author</b>                                                                                                                                                                                                                                                                                                         | Authors (separate authors with a comma or 'and')                                                                                                                                                                                                                                           |
|                               | <b>editor</b>                                                                                                                                                                                                                                                                                                         | Editors (separate editors with a comma or 'and')                                                                                                                                                                                                                                           |
|                               | <b>type</b>                                                                                                                                                                                                                                                                                                           | The type of publication: 'article', 'book', or 'incollection'                                                                                                                                                                                                                              |
|                               | <b>chapter</b>                                                                                                                                                                                                                                                                                                        | Chapter number, required if the type is 'incollection'                                                                                                                                                                                                                                     |
|                               | <b>volume</b>                                                                                                                                                                                                                                                                                                         | Volume of the publication (not used so far)                                                                                                                                                                                                                                                |
|                               | <b>doi</b>                                                                                                                                                                                                                                                                                                            | DOI (Digital Object Identifier) for this publication (formatted as in BibTeX, that is, including )                                                                                                                                                                                         |
|                               | <b>url</b>                                                                                                                                                                                                                                                                                                            | URL to access this publication; if a DOI is available, this is a secondary link                                                                                                                                                                                                            |
|                               | <b>sm_url</b>                                                                                                                                                                                                                                                                                                         | URL for the Supplemental Material; empty string if this publication has no SM<br>Note: the SM will appear as a reference in addition to the main document when this field is filled",                                                                                                      |
|                               | <b>publisher</b>                                                                                                                                                                                                                                                                                                      | The publisher; inherited if left empty and a parent reference is available                                                                                                                                                                                                                 |
|                               | <b>pages</b>                                                                                                                                                                                                                                                                                                          | Either the total number of pages, or the page range of this part of a book                                                                                                                                                                                                                 |
|                               | <b>crossref_id</b>                                                                                                                                                                                                                                                                                                    | Unique identifier (foreign key): a parent reference, such as a report in which this reference is a chapter                                                                                                                                                                                 |
|                               | <b>fullref</b>                                                                                                                                                                                                                                                                                                        | The full text of the reference for this publication, in Markdown format                                                                                                                                                                                                                    |
|                               | <b>sm_fullref</b>                                                                                                                                                                                                                                                                                                     | The full text of the reference of the supplementary material for this publication, in Markdown format                                                                                                                                                                                      |
| <b>embers_count</b>           | 178                                                                                                                                                                                                                                                                                                                   |                                                                                                                                                                                                                                                                                            |
| <b>ember_inclusion_levels</b> |                                                                                                                                                                                                                                                                                                                       |                                                                                                                                                                                                                                                                                            |



|                       |                                                                                                                                                                                                                                                                                   |    |                          |  |  |
|-----------------------|-----------------------------------------------------------------------------------------------------------------------------------------------------------------------------------------------------------------------------------------------------------------------------------|----|--------------------------|--|--|
|                       |                                                                                                                                                                                                                                                                                   | -3 | Not in any IPCC figure   |  |  |
|                       |                                                                                                                                                                                                                                                                                   | -2 | Excluded: see sup. info. |  |  |
|                       |                                                                                                                                                                                                                                                                                   | -1 | Excluded: superseded     |  |  |
|                       |                                                                                                                                                                                                                                                                                   | 0  | Undefined                |  |  |
|                       |                                                                                                                                                                                                                                                                                   | 1  | Included with remarks    |  |  |
|                       |                                                                                                                                                                                                                                                                                   | 2  | Included                 |  |  |
| <b>format_version</b> | 1.0                                                                                                                                                                                                                                                                               |    |                          |  |  |
| <b>license</b>        | CC BY 4.0                                                                                                                                                                                                                                                                         |    |                          |  |  |
| <b>license_url</b>    | <a href="https://creativecommons.org/licenses/by/4.0/">https://creativecommons.org/licenses/by/4.0/</a>                                                                                                                                                                           |    |                          |  |  |
| <b>cite_as</b>        | <a href="https://doi.org/10.5281/zenodo.12626977">https://doi.org/10.5281/zenodo.12626977</a>                                                                                                                                                                                     |    |                          |  |  |
| <b>disclaimer</b>     | This file is not an IPCC product. The IPCC does not assume any responsibility for the accuracy of its content. For any use of the data, please refer to the information provided through the link under 'cite_as' and provide the sources shown in the 'biblioreferences' fields. |    |                          |  |  |

### S1.3. Remote API Access point & token

There is a single access point to request data: [https://climrisk.org/edb/api/combined\\_data](https://climrisk.org/edb/api/combined_data)

In the future, this access point could provide access to updates before these are made available as new file versions on Zenodo (<https://doi.org/10.5281/zenodo.12626976>). The date of the last update of the data for a given ember is shown at the bottom of the page in the Climate Risks Embers Explorer. We regard the remote API as a tool that may help in conducting future research using updated data, while publications based on updates will likely continue to rely on the archive files published on Zenodo with versioning and explanations about the changes.

Access currently requires a token which normally identifies the user (we may consider full public access in the future depending on actual use of this function). However, at least for the duration of the review period, it is possible to test this function anonymously by using the following « public token »:  
70cae8402eeb7862ffbd13015c7273dc22aef4d

Requests may include one or more of 'filter' parameters (search criteria). Information on these filters is available in the documentation provided with the code (file 'Embers\_retrieve\_API.md'), available on Zenodo (Marbaix, 2024) or GitHub: [https://github.com/pmarbaix/EDB\\_paper/blob/main/Embers\\_retrieve\\_API.md](https://github.com/pmarbaix/EDB_paper/blob/main/Embers_retrieve_API.md)

You may use cURL to test data retrieval. For example,

```
curl "https://climrisk.org/edb/api/combined_data?source=AR6_WGII_Chapter16" -H
"Authorization: Token {token}"
```

(replace {token} with the above public token) would retrieve the data for the "Reasons for concern" embers as assessed in IPCC AR6 (O'Neill et al., 2022). The Climate Risks Embers Explorer uses the same data to reconstruct ember diagrams and provide information in an interactive way: <https://climrisk.org/cree/emberfigure?figure=14>

More examples and information are available in (Marbaix, P., 2024). The code includes a script to build all the figures and tables in the paper in a single run (or separately), taking input either from the archive file or from the remote API.

## S2 Sources and calculations related to the GMT/GMSST ratio

This section provides the background information for table 2 and the box « From sea-surface temperature to global mean temperature change »: the specific source of each value and the calculation of the ratio.

Least-square linear regressions are used to estimate the GMT/GMSST ratio (GSR): this only assumes approximate linearity of global mean temperature change (GMT) with global mean sea surface temperature (GMSST). This assumption is reasonable given the available data, as shown in Fig. S1. For each set of estimates, we also provide the mean value of the ratio for each scenario and/or time period, showing that both approaches give almost identical results. As explained in the main paper, estimating the GSR is challenging due to several sources of uncertainty.

### 1. SROCC projections

| Source: table CB1.1 in Abram et al. 2019         | GMSST | GMT (=GSAT) | GMT/GMSST |
|--------------------------------------------------|-------|-------------|-----------|
| RCP2.6                      1986-2005=>2031-2050 | 0.64  | 0.9         | 1.41      |
| RCP8.5                                           | 0.95  | 1.4         | 1.47      |
| RCP2.6                      1986-2005=>2081-2100 | 0.73  | 1           | 1.37      |
| RCP8.5                                           | 2.58  | 3.7         | 1.43      |
| Mean: 1.42                                       |       |             |           |
| Linear reg.: 1.43                                |       |             |           |

### 2. AR6 projections / ref. period 1995-2014

| Sources:<br>SST: Section 9.2.1.1, p.1223 in Fox-Kemper et al. 2021;<br>GMT(GSAT) and GMAT : Table 4.2 (p572 in Lee et al. 2021).<br>Note: all are 'unconstrained', CMIP6-only values. | GMSST      | GMT (=GSAT) | GMT/GMSST |
|---------------------------------------------------------------------------------------------------------------------------------------------------------------------------------------|------------|-------------|-----------|
| SSP1-1.9                                                                                                                                                                              | not avail. | 0.7         | -         |
| SSP1-2.6                                                                                                                                                                              | 0.86       | 1.2         | 1.40      |
| SSP2-4.5                      1995-2014=>2081-2100                                                                                                                                    | 1.51       | 2           | 1.32      |
| SSP3-7.0                                                                                                                                                                              | 2.19       | 3.1         | 1.42      |
| SSP5-8.5                                                                                                                                                                              | 2.89       | 4           | 1.38      |
| Mean: 1.38                                                                                                                                                                            |            |             |           |
| Linear reg.: 1.39                                                                                                                                                                     |            |             |           |

| GMAT (marine surface air T) | GMT/GMAT |
|-----------------------------|----------|
| 0.6                         | 1.17     |
| 1                           | 1.20     |
| 1.8                         | 1.11     |
| 2.7                         | 1.15     |
| 3.4                         | 1.18     |
| Mean: 1.16                  |          |
| Linear reg.: 1.16           |          |

### 3. AR6 / 1850-1900 ('pre-ind'; observations from 1850-1900 to 1995-2014 + scenarios)

| Sources<br>GMSST: calculated from above (2.) + historical warming below (3., green cell) for GMSST<br>GMT: table 4.2 (p572 in Lee et al. 2021). | GMSST | GMT (GSAT proj.+GMST historical) | GMT/GMSST |
|-------------------------------------------------------------------------------------------------------------------------------------------------|-------|----------------------------------|-----------|
| SSP1-2.6                                                                                                                                        | 1.53  | 2                                | 1.31      |
| SSP2-4.5                      1850-1900 =>2081-2100                                                                                             | 2.18  | 2.9                              | 1.33      |
| SSP3-7.0                                                                                                                                        | 2.86  | 3.9                              | 1.36      |
| SSP5-8.5                                                                                                                                        | 3.56  | 4.8                              | 1.35      |
| Mean: 1.34                                                                                                                                      |       |                                  |           |
| Linear reg.: 1.35                                                                                                                               |       |                                  |           |

### 4. AR6 - observations

| Source : Table 2.4 in Gulev et al. 2021 | GMSST | GMST ('blended' air/water T) | GMST/GMSST |
|-----------------------------------------|-------|------------------------------|------------|
| 1850-1900 => 1995-2014                  | 0.67  | 0.85                         | 1.27       |
| 1850-1900 => 2001-2020                  | 0.79  | 0.99                         | 1.25       |
| Mean (obs & proj): 1.31                 |       |                              |            |

**Table S1: Estimates of GMT/GMSST and their sources.**

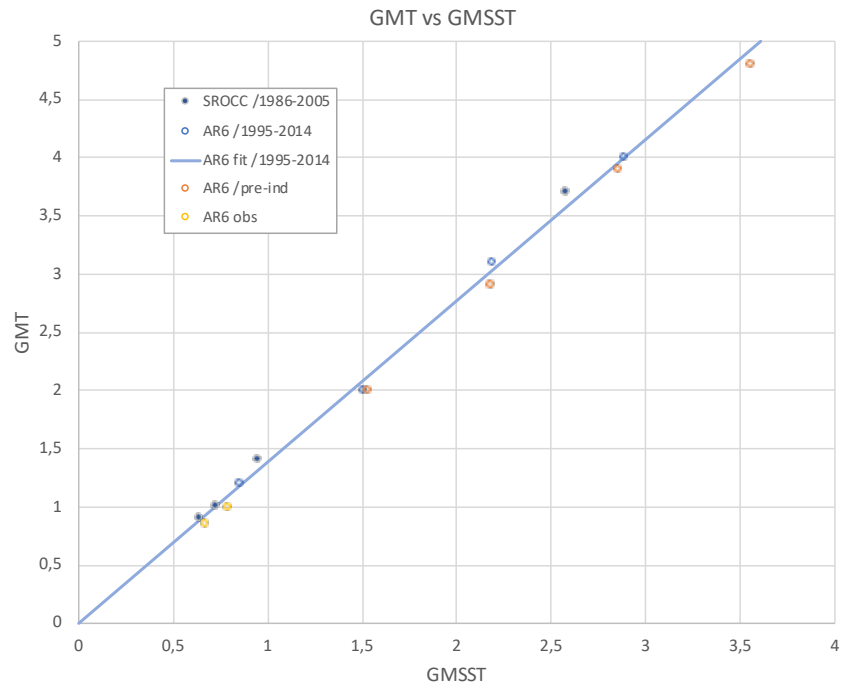

**Figure S1: Estimates of GMT vs GMSST from recent IPCC reports, following table S1**

### S3 Extraction of risk transition limits from AR5 SYR ember diagrams

For the five embers in figure 2.5 of the Synthesis Report of AR5 (IPCC, 2014), the data was extracted from the original figures using the approach described in Marbaix 2020. The density of each of the colour (red, green, blue) within each ember and the vertical scale are extracted by software, as shown on figure S.2 (page 12). This allows a manual determination of each transition, which is largely sufficient to reconstruct the embers without adding significant uncertainty. The values obtained are shown below. To confirm these values, the reconstructed embers are shown next to the original figure S.3 (page 13).

#### Risk for terrestrial and freshwater species impacted by the rate of warming

| Name            | Risk Transition          | Rate of change (°C/year) |       |
|-----------------|--------------------------|--------------------------|-------|
| Global averages | Undetectable to Moderate | Min                      | 0.000 |
|                 |                          | Max                      | 0.003 |
|                 | Moderate to High         | Min                      | 0.033 |
|                 |                          | Max                      | 0.050 |
| Flat landscapes | Undetectable to Moderate | Min                      | 0.000 |
|                 |                          | Max                      | 0.001 |
|                 | Moderate to High         | Min                      | 0.009 |
|                 |                          | Max                      | 0.013 |
|                 | High to Very High        | Min                      | 0.025 |
|                 |                          | Max                      | 0.080 |

#### Risk for marine species impacted by ocean acidification only, or additionally by warming extremes

| Name                            | Risk Transition          | Atmospheric CO <sub>2</sub> (ppm) |     |
|---------------------------------|--------------------------|-----------------------------------|-----|
| Ocean acidification only        | Undetectable to Moderate | Min                               | 360 |
|                                 |                          | Max                               | 380 |
|                                 | Moderate to High         | Min                               | 380 |
|                                 |                          | Max                               | 520 |
|                                 | High to Very High        | Min                               | 650 |
|                                 |                          | Max                               | 700 |
| Ocean acidification and warming | Undetectable to Moderate | Min                               | 350 |
|                                 |                          | Max                               | 370 |
|                                 | Moderate to High         | Min                               | 390 |
|                                 |                          | Max                               | 430 |
|                                 | High to Very High        | Min                               | 510 |
|                                 |                          | Max                               | 540 |

#### Risk for coastal human and natural systems impacted by sea level rise

| Name           | Risk Transition          | Sea level rise (m, relative to 1986–2005) |      |
|----------------|--------------------------|-------------------------------------------|------|
| Sea level rise | Undetectable to Moderate | Min                                       | -0.2 |
|                |                          | Max                                       | 0.1  |
|                | Moderate to High         | Min                                       | 0.1  |
|                |                          | Max                                       | 1.0  |
|                | High to Very High        | Min                                       | 1.0  |
|                |                          | Max                                       | 2.0  |

**Table S2: Limits of the transitions for AR5 SYR embers, obtained from the diagrams.**

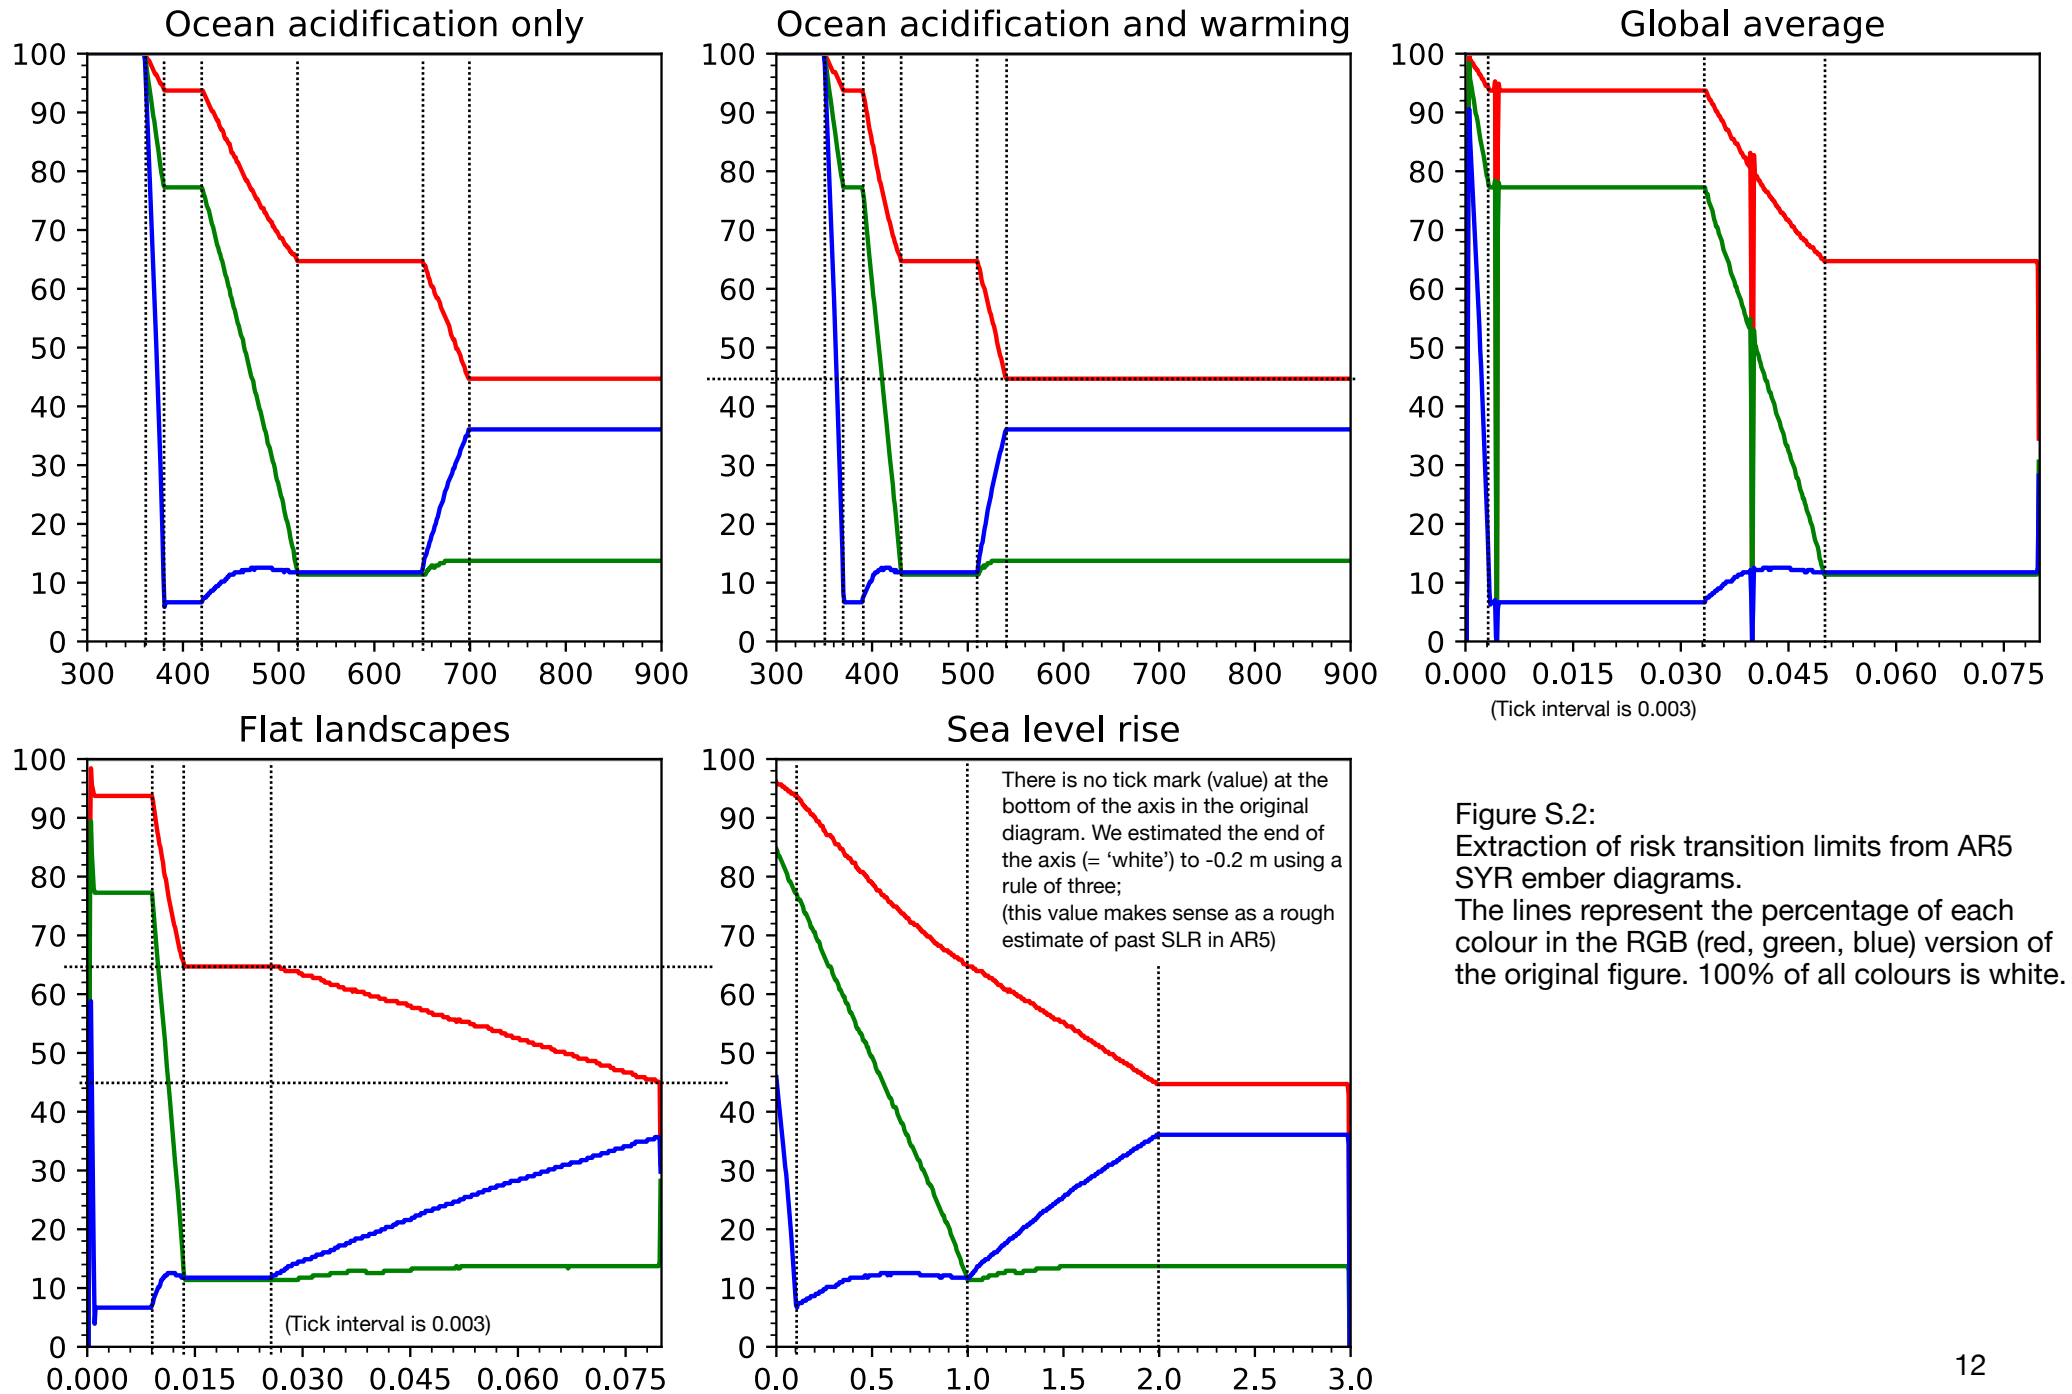

Figure S.2:  
Extraction of risk transition limits from AR5 SYR ember diagrams. The lines represent the percentage of each colour in the RGB (red, green, blue) version of the original figure. 100% of all colours is white.

Figure S.3: Comparison of the reconstructed AR5 SYR embers to the original figure panels.

Original embers from AR5 SYR Figure 2.5 (IPCC 2014)

(a) Risk for terrestrial and freshwater species impacted by the rate of warming

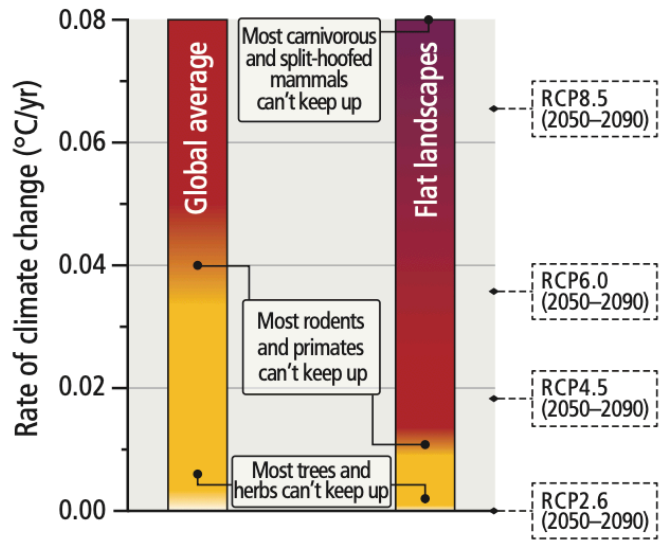

(b) Risk for marine species impacted by ocean acidification only, or additionally by warming extremes

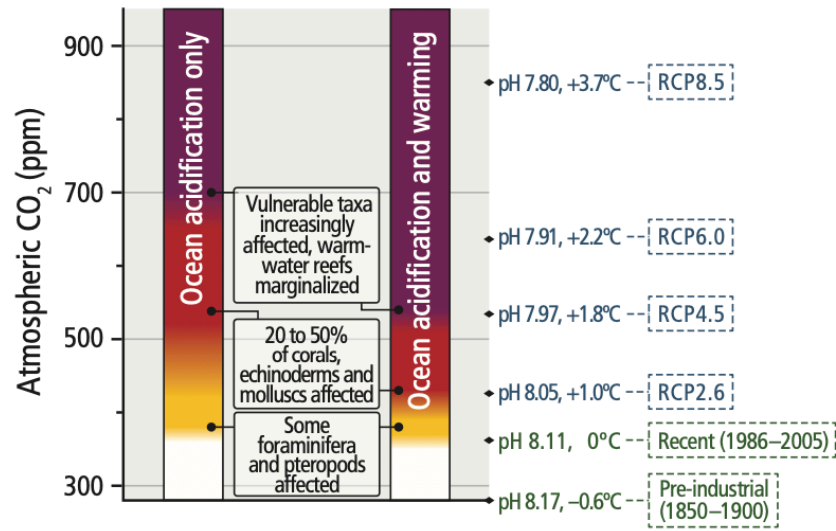

(c) Risk for coastal human and natural systems impacted by sea level rise

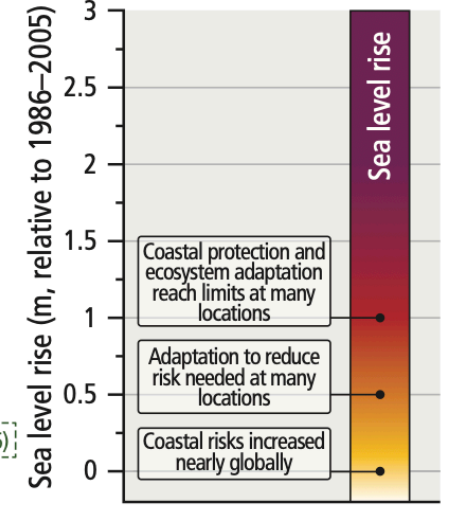

Reconstruction with the database values

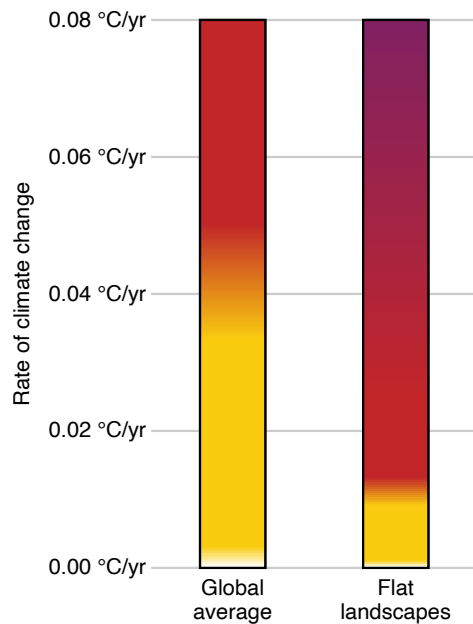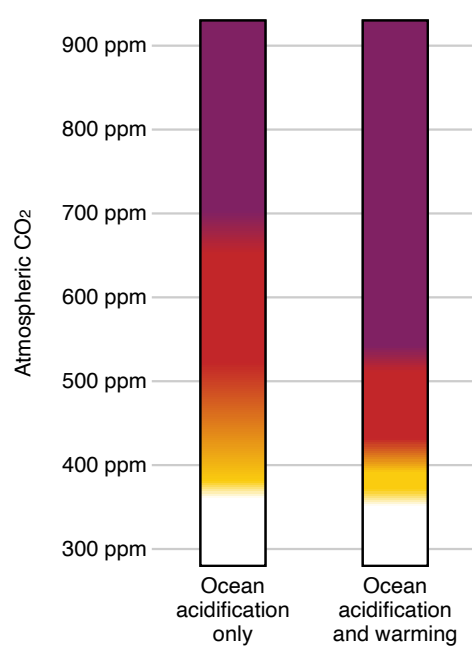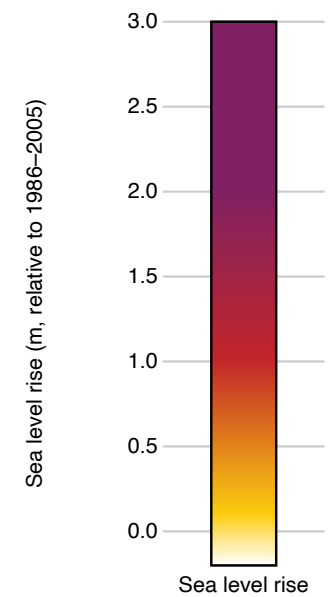

## References

---

- Abram, N., J.-P. Gattuso, A. Prakash, L. Cheng, M.P. Chidichimo, S. Crate, H. Enomoto, M. Garschagen, N. Gruber, S. Harper, E. Holland, R.M. Kudela, J. Rice, K. Steffen, and K. von Schuckmann: Framing and Context of the Report. In: IPCC Special Report on the Ocean and Cryosphere in a Changing Climate, 2019.
- Fox-Kemper, B., Hewitt, H. T., Xiao, C., Aðalgeirsdóttir, G., Drijfhout, S. S., Edwards, T. L., Golledge, N. R., Hemer, M., Kopp, R. E., Krinner, G., Mix, A., Notz, D., Nowicki, S., Nurhati, I. S., Ruiz, L., Sallée, J.-B., Slangen, A. B. A., and Yu, Y.: Ocean, Cryosphere and Sea Level Change, edited by: Masson-Delmotte, V., Zhai, P., Pirani, A., Connors, S. L., Péan, C., Berger, S., Caud, N., Chen, Y., Goldfarb, L., Gomis, M. I., Huang, M., Leitzell, K., Lonnoy, E., Matthews, J. B. R., Maycock, T. K., Waterfield, T., Yelekçi, O., Yu, R., and Zhou, B., *Climate Change 2021: The Physical Science Basis. Contribution of Working Group I to the Sixth Assessment Report of the Intergovernmental Panel on Climate Change*, <https://doi.org/10.1017/9781009157896.011>, 2021.
- Gulev, S. K., Thorne, P. W., Ahn, J., Dentener, F. J., Domingues, C. M., Gerland, S., Gong, D., Kaufman, D. S., Nnamchi, H. C., Quaas, J., Rivera, J. A., Sathyendranath, S., Smith, S. L., Trewin, B., von Schuckmann, K., and Vose, R. S.: Changing State of the Climate System, edited by: Masson-Delmotte, V., Zhai, P., Pirani, A., Connors, S. L., Péan, C., Berger, S., Caud, N., Chen, Y., Goldfarb, L., Gomis, M. I., Huang, M., Leitzell, K., Lonnoy, E., Matthews, J. B. R., Maycock, T. K., Waterfield, T., Yelekçi, O., Yu, R., and Zhou, B., *Climate Change 2021: The Physical Science Basis. Contribution of Working Group I to the Sixth Assessment Report of the Intergovernmental Panel on Climate Change*, <https://doi.org/10.1017/9781009157896.004>, 2021.
- IPCC: *Climate Change 2014: Synthesis Report. Contribution of Working Groups I, II and III to the Fifth Assessment Report of the Intergovernmental Panel on Climate Change*, edited by: Core writing team, R.K. Pachauri, and L. A. Meyer, IPCC, 151 pp., 2014.
- Lee, J.-Y., Marotzke, J., Bala, G., Cao, L., Corti, S., Dunne, J. P., Engelbrecht, F., Fischer, E., Fyfe, J. C., Jones, C., and others: Future global climate: scenario-based projections and near-term information, in: *Climate Change 2021: The Physical Science Basis. Contribution of Working Group I to the Sixth Assessment Report of the Intergovernmental Panel on Climate Change*, 2021.
- Marbaix, P.: Reconstruction of data regarding the « Reasons for concern » about climate change from figures in IPCC and related publications, <https://doi.org/10.5281/ZENODO.3992857>, 2020.
- Marbaix, P.: Code for analysing data and producing figures from the “burning embers” database, <https://doi.org/10.5281/zenodo.12799901>, 2024.
- O’Neill, B., van Aalst, M., Zaiton Ibrahim, Z., Berrang Ford, L., Bhadwal, S., Buhaug, H., Diaz, D., Frieler, K., Garschagen, M., Magnan, A., Midgley, G., Mirzabaev, A., Thomas, A., and Warren, R.: Key Risks Across Sectors and Regions, edited by: Pörtner, H. O., Roberts, D. C., Tignor, M., Poloczanska, E. S., Mintenbeck, K., Alegría, A., Craig, M., Langsdorf, S., Löschke, S., Möller, V., Okem, A., and Rama, B., *Climate Change 2022: Impacts, Adaptation and Vulnerability. Contribution of Working Group II to the Sixth Assessment Report of the Intergovernmental Panel on Climate Change*, <https://doi.org/10.1017/9781009325844.025>, 2022.
